# Supplementary material for: Plant GARDEN: a portal website for cross-searching between different types of genomic and genetic resources in a wide variety of plant species
Source: PubMed Central journal article supplement (PMC10422841; doi:10.1186/s12870-023-04392-8), 2023-08-12
Supplement: 12870_2023_4392_MOESM1_ESM.pdf [file 12870_2023_4392_MOESM1_ESM.pdf]

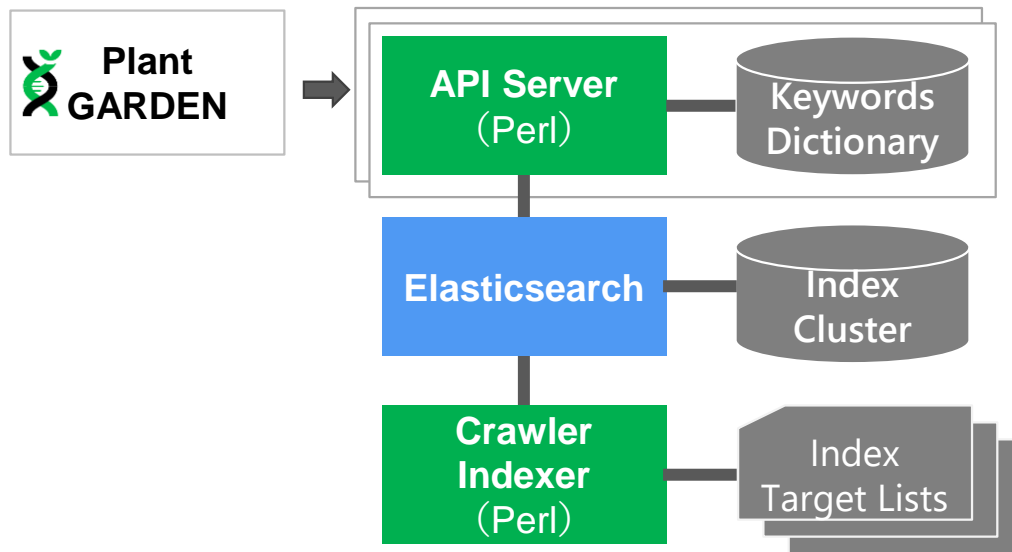

**Supplementary Fig. S1.**

Structure of *pages*, the developed keyword search system. Blue and green boxes indicate external and developed search systems, respectively. Gray boxes indicate contents developed for the keyword search.

**A) Genome**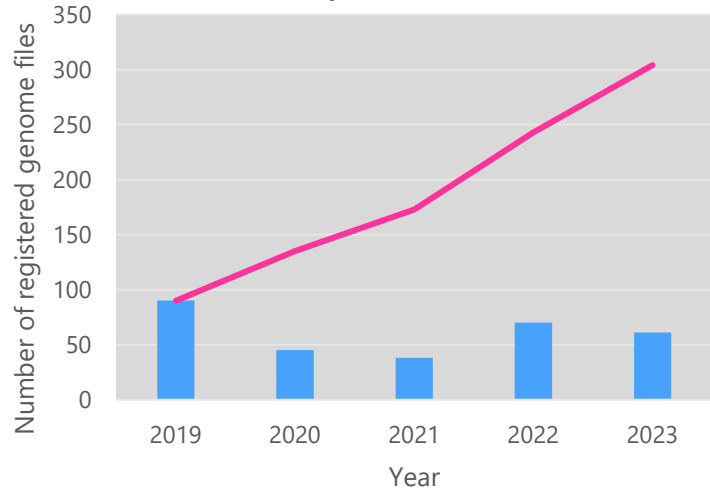**B) Gene**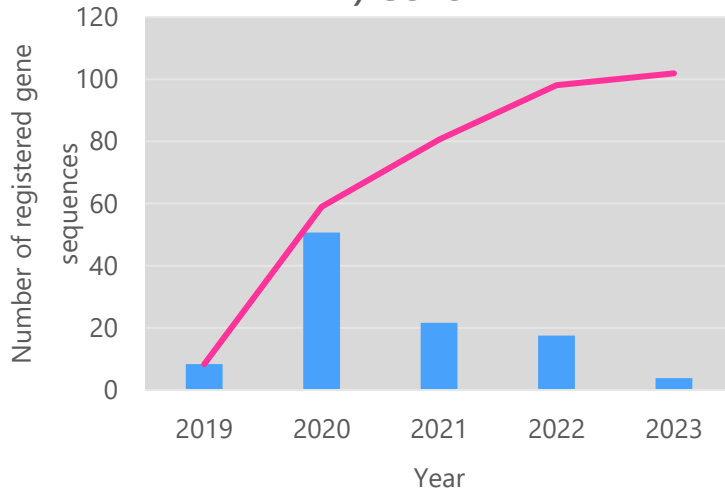**C) Marker**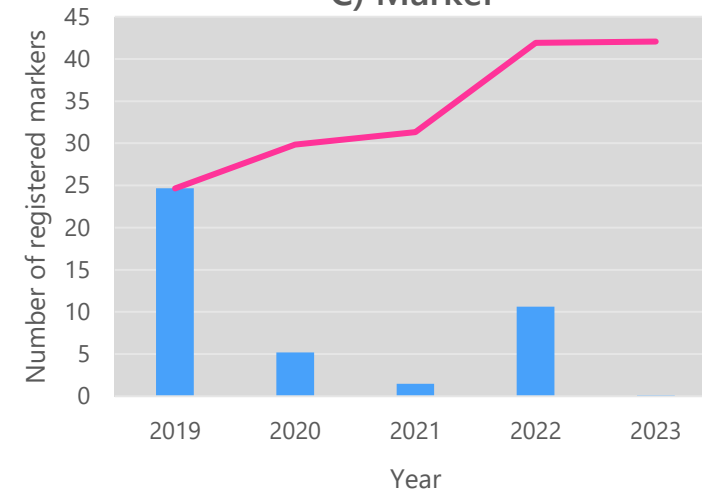**D) Linkage map**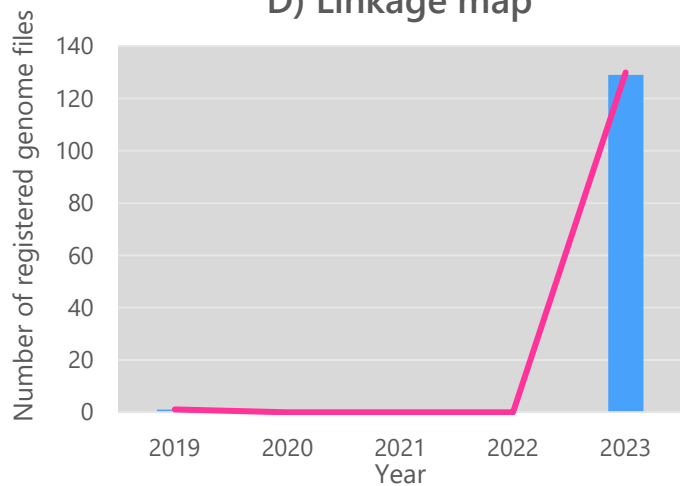**E) Trait-related loci**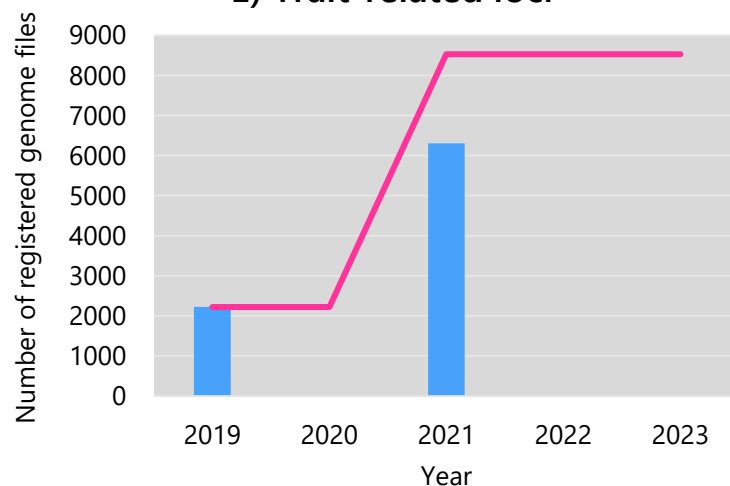**Supplementary Fig. S2.**

Numbers of registered data in Plant GARDEN since 2019. The data is as of March every year. A) genome files, B) gene sequences, C) Marker. D) linkage map, E) trait related loci.

Blue bars and pink lines indicate the annual registration number and cumulative number, respectively.

*Lotus japonicus*

Sequence Name : Lj3.0

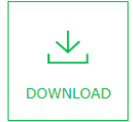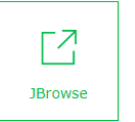

Details of the Assembled Genome Sequences

|                                               |                                                                           |                             |                                                                             |
|-----------------------------------------------|---------------------------------------------------------------------------|-----------------------------|-----------------------------------------------------------------------------|
| Sequence Name                                 | Lj3.0                                                                     | Biological Sample           | Miyakojima MG-20                                                            |
| Number of Sequences                           | 9                                                                         | Number of Chromosomes       | 2n = 2x = 12                                                                |
| Total Length (bp)                             | 447,416,816                                                               | N50 Length (bp)             | 62,285,374                                                                  |
| Number of Genes                               | 48,105                                                                    | Number of Genes Source File | Lj3.0_pep.fna                                                               |
| Number of Genes Annotated by Hayai-annotation | 48,105                                                                    | Hayai-Annotation Version    | zen_v2.0                                                                    |
| Sequencing Method                             | Sanger, Illumina, 454                                                     | Read Depth                  | 35x                                                                         |
| Assembly Method                               | Paracel Genome Assembler                                                  | Estimated Genome Size (Mb)  | 465                                                                         |
| Sequencing Method Comments                    |                                                                           | Comments                    |                                                                             |
| DOI/PMID                                      | <a href="https://doi.org/10.1093/dnares/dsn008">10.1093/dnares/dsn008</a> | Corresponding author        | Satoshi TABATA (Kazusa DNA Research Institute)                              |
| Data Source                                   | Lotus japonicus Genome Sequencing Project                                 | Data Source URL             | <a href="http://www.kazusa.or.jp/lotus/">http://www.kazusa.or.jp/lotus/</a> |
| BUSCO Version                                 | 5.1.0                                                                     | BUSCO Dataset               | embryophyta_odb10                                                           |
| BUSCO Genome                                  | C:93.5%[S:86.9%,D:6.6%],F:3.7%,M:2.8%,n:1614                              | BUSCO Gene (pep/cds)        | C:79.8%[S:59.5%,D:20.3%],F:11.9%,M:8.3%,n:1614                              |

**Supplementary Fig. S3.**

A screen view of the assembled stats table on a genome sequence page of Lj3.0 in *Lotus japonicus*. We performed a test of the quality of the assembled genome and gene sequences by using BUSCOs.

A)

Lotus japonicus

Assembly Name:Lj3.0

Gene File:Lj3.0\_pep.fna.gz

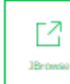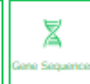

## Detail of the Gene Sequence

| Position on the Genome               | Gene Name                    | CDS                                                                   | Lj3g3v0303780.2        |
|--------------------------------------|------------------------------|-----------------------------------------------------------------------|------------------------|
|                                      |                              | PEP                                                                   | Lj3g3v0303780.2        |
| Position on the Genome               | Chromosome                   | Lj3.0_chr3                                                            |                        |
|                                      | Start Position               | 2207888                                                               |                        |
|                                      | End Position                 | 2214202                                                               |                        |
|                                      | Strand                       | +                                                                     |                        |
| Annotation<br>(Hayai Annotation ZEN) | KusakiDB                     | KusakiDB Accession                                                    | KPRO00028977           |
|                                      |                              | KusakiDB version                                                      | 2                      |
|                                      |                              | Evidence is present                                                   | Yes                    |
|                                      |                              | Databases intersection<br>(the sequence exists in multiple databases) | orthodb-refseq-uniprot |
| OrthoDB                              | Database version             | 10.1                                                                  |                        |
|                                      | Description                  | Protein kinase domain                                                 |                        |
|                                      | Gene ID                      | 3885_0:00328b                                                         |                        |
|                                      | Ortholog group unique ID     | 28179at33090                                                          |                        |
| Functional annotation                | Source DB                    | refseq                                                                |                        |
|                                      | Protein name                 | inactive protein kinase SELMODRAFT_444075-like                        |                        |
|                                      | Accession                    | XP_027344439   Details                                                |                        |
|                                      | CrossRef Refseq from UniProt | NA                                                                    |                        |
|                                      | EC                           | NA                                                                    |                        |
|                                      | KEGG entry                   | NA                                                                    |                        |
|                                      | KO ID                        | NA                                                                    |                        |
|                                      | Pfam ID                      | PF00069                                                               |                        |
|                                      | Pfam Description             | Details                                                               |                        |
|                                      | InterPro ID                  | IPR000719                                                             |                        |
|                                      | InterPro Description         | Details                                                               |                        |

B)

## Annotation Details

| ID                                     | Group/Do...  | Name                                           | Link          |
|----------------------------------------|--------------|------------------------------------------------|---------------|
| <b>Source Annotation (1 item)</b>      |              |                                                |               |
| <input type="checkbox"/> XP_027344439  |              | inactive protein kinase SELMODRAFT_444075-like | UniProt       |
| <b>OrthoDB (1 item)</b>                |              |                                                |               |
| <input type="checkbox"/> 3885_0:00328b | 28179at33090 | Protein kinase domain                          | OrthoDB(SIB)  |
| <b>Pfam (1 item)</b>                   |              |                                                |               |
| <input type="checkbox"/> PF00069       |              | Protein kinase domain                          | Pfam          |
| <b>InterPro (1 item)</b>               |              |                                                |               |
| <input type="checkbox"/> IPR000719     |              | Protein kinase domain                          | InterPro(EBI) |
| <b>Gene ontology (3 items)</b>         |              |                                                |               |
| <input type="checkbox"/> GO:0004672    | MF           | protein kinase activity                        | QuickGO(EBI)  |
| <input type="checkbox"/> GO:0005524    | MF           | ATP binding                                    | QuickGO(EBI)  |
| <input type="checkbox"/> GO:0006468    | BP           | protein phosphorylation                        | QuickGO(EBI)  |
| <b>GO slim (5 items)</b>               |              |                                                |               |
| <input type="checkbox"/> GO:0006793    | BP           | phosphorus metabolic process                   | QuickGO(EBI)  |
| <input type="checkbox"/> GO:0006464    | BP           | cellular protein modification process          | QuickGO(EBI)  |
| <input type="checkbox"/> GO:0000166    | MF           | nucleotide binding                             | QuickGO(EBI)  |
| <input type="checkbox"/> GO:0043167    | MF           | ion binding                                    | QuickGO(EBI)  |
| <input type="checkbox"/> GO:0016740    | MF           | transferase activity                           | QuickGO(EBI)  |

Search Checked ID

## Supplementary Fig. S4.

A screen view of the functional annotation in a gene sequence page, Lj3g3v0303780.2, on the Lj3.0 genome. Re-annotation of all genes registered in Plant GARDEN was performed by our group using Hayai-Annotation. A) A main gene table. B) A detailed table of the functional annotations displayed below the main table. The IDs shown in the detailed annotations table are linked to the external database.

A)

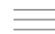

*Lotus japonicus*

| ID               | Population Name                      | Line List | Variant Type  | Reference Sequence | Sequence Type | Variant Counts | Data Source  | Comments                                                 | Download |          | TASUKE+ | JBrowse |
|------------------|--------------------------------------|-----------|---------------|--------------------|---------------|----------------|--------------|----------------------------------------------------------|----------|----------|---------|---------|
|                  |                                      |           |               |                    |               |                |              |                                                          | Table    | Vcf file |         |         |
| t34305.SNP000001 | Lotus_japonicus_SRA_9_lines_20191022 |           | SNPs, In/dels | Lj3.0              | WGS           | 354,881        | Plant GARDEN | Bwa/bcftools 1.9, (QUAL≥200, 10≤DP≤200, max-missing=0.7) |          |          |         |         |

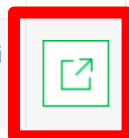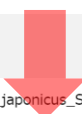

B)

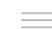

*Lotus japonicus*

| Bio Sample                         | Sequence Name | Accession  | JBrowse | gVCF | Comment |
|------------------------------------|---------------|------------|---------|------|---------|
| Gifu B129                          | SRA799662     | SRX4941819 |         |      |         |
| Miyakojima MG-20                   | DRA001236     | DRX013250  |         |      |         |
| Miyakojima MG-20                   | DRA001236     | DRX013249  |         |      |         |
| Miyakojima MG-20 (EMS-mutagenised) | SRA188542     | SRX729747  |         |      |         |
| Miyakojima MG-20 (EMS-mutagenised) | SRA188542     | SRX719550  |         |      |         |
| nrsym1-2                           | DRA005940     | DRX090748  |         |      |         |
| nrsym1-2                           | DRA005940     | DRX090747  |         |      |         |

**Supplementary Fig. S5.**

A screen view of base variant lists in *L. japonicus*. A) A vcf file list on the “Find Variants” page. The conditions of the variant call are described in the comments file. A vcf and a text table, which show the variant bases with the letters A, G, T, and C, are available for download. The variant positions are displayed on the two browsers, TASUKE+ and JBrowse. B) A list of gvcf files and SRAs. The list is displayed by clicking the Line list button in the vcf file list.

A)

TOP > Species list > *Vitis vinifera* > Search by Marker Type*Vitis vinifera*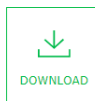

1 2 3 4 5 ... ▶

Number of Hit Markers : 487

1-50 件表示 ▼

| Marker ID ↓      | Marker Name ↓ | Type ↓ | Fw Primer Start Position |              |                  |
|------------------|---------------|--------|--------------------------|--------------|------------------|
|                  |               |        | Reference Genome ↓       | Chromosome ↓ | Start Position ↓ |
| t29760.M000373.1 | FAM79         | SSR    | 12X                      | 1            | 579169           |
| t29760.M000443.1 | VChr1a        | SSR    | 12X                      | 1            | 2819297          |
| t29760.M000012.1 | vmc8A7        | SSR    | 12X                      | 1            | 3423317          |
| t29760.M000171.1 | scu04vv       | SSR    | 12X                      | 1            | 4261254          |
| t29760.M000342.1 | FAM47         | SSR    | 12X                      | 1            | 5326620          |
| t29760.M000445.1 | VChr1c        | SSR    | 12X                      | 1            | 11408586         |
| t29760.M000444.1 | VChr1b        | SSR    | 12X                      | 1            | 11457785         |
| t29760.M000380.1 | FAM86         | SSR    | 12X                      | 1            | 11610088         |
| t29760.M000433.1 | FAM141        | SSR    | 12X                      | 1            | 16536955         |
| t29760.M000469.1 | VChr13b       | SSR    | 12X                      | 13_random    | 2689217          |
| t29760.M000402.1 | FAM108        | SSR    | 12X                      | 2            | 1574031          |
| t29760.M000447.1 | VChr2b        | SSR    | 12X                      | 2            | 3888472          |

B)

*Vitis vinifera*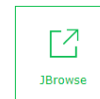

|                        |                                                       |                       |
|------------------------|-------------------------------------------------------|-----------------------|
| Marker ID              | t29760.M000443.1                                      |                       |
| Marker Name            | VChr1a                                                |                       |
| Type                   | SSR                                                   |                       |
| Position on the Genome | Reference Genome                                      | 12X                   |
|                        | Chromosome                                            | 1                     |
|                        | Fw Primer                                             | TTCATACCTTGCAGGGAGCTA |
|                        | Start Position                                        | 2819297               |
|                        | End Position                                          | 2819317               |
|                        | Rv Primer                                             | TGATTTCCATTCCCAAATTCA |
|                        | Start Position                                        | 2819515               |
| End Position           | 2819495                                               |                       |
| Target Sequences       | NA                                                    |                       |
| Allele [Sample Name]   | 7 [Chardonnay VCR 4]; 7 [Merlot VCR 494]; 7 [PN40024] |                       |
| Restriction Enzyme     | NA                                                    |                       |
| Comment                |                                                       |                       |
| DOI                    | 10.1186/1471-2229-8-127                               |                       |
| PubMed                 | 19087321                                              |                       |

### Supplementary Fig. S6.

A screen view of the PCR-based DNA marker lists. A) A partial view of the DNA marker list in *Vitis vinifera*. Marker names, types, and positions on the reference genome and the name of the reference genome are shown. B) The detailed information of the selected marker. The table is shown by clicking the marker ID in the marker list. The marker name, type, primer or target sequences and their positions on the genome, and source manuscript information are available. Allele information was derived from the source manuscript by manual curation. The restriction enzyme is for CAPS or dCAPS markers.

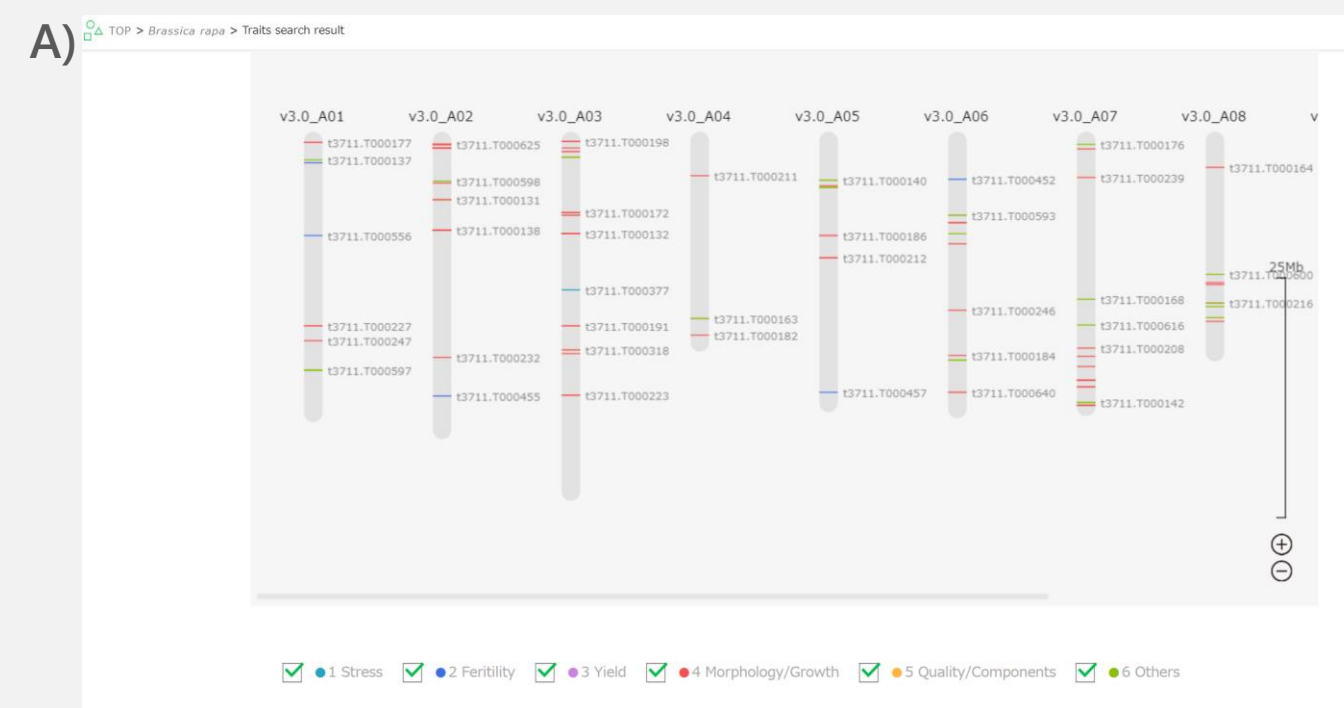

B) *Brassica rapa*

Results : 642 Hit(s)

| Trait ↓      | Category ↓        | Nearest Marker 1   | Nearest Marker 2          | Trait / Analysis Method / Population Name / Population Type |                  |                | Other Data                    | Locus ID ↓ |
|--------------|-------------------|--------------------|---------------------------|-------------------------------------------------------------|------------------|----------------|-------------------------------|------------|
|              |                   | Reference Genome ↓ | Nearest Marker 1 ↓        | Chromosome ↓                                                | Start Position ↓ | End Position ↓ |                               |            |
| Bolting time | Morphology/Growth | BrapaV3.0          | <a href="#">cnu_m616a</a> | A02                                                         | 721260           | 721528         | <a href="#">t3711.T000124</a> |            |
| Bolting time | Morphology/Growth | BrapaV3.0          | <a href="#">cnu_m335a</a> | A08                                                         | 19606371         | 19606574       | <a href="#">t3711.T000125</a> |            |
| Bolting time | Morphology/Growth | BrapaV3.0          | <a href="#">cnu_m372a</a> | A09                                                         | 34123484         | 34123659       | <a href="#">t3711.T000126</a> |            |
| Bolting time | Morphology/Growth | BrapaV3.0          | <a href="#">ACMP00598</a> | A10                                                         | 15798743         | 15799010       | <a href="#">t3711.T000127</a> |            |
| Bolting time | Morphology/Growth | BrapaV3.0          | <a href="#">cnu_m056a</a> | A07                                                         | 26030383         | 26030580       | <a href="#">t3711.T000128</a> |            |
| Bolting time | Morphology/Growth | BrapaV3.0          | <a href="#">SNP-CKX3a</a> | A02                                                         | 6286170          | 6286372        | <a href="#">t3711.T000131</a> |            |
| Bolting time | Morphology/Growth | BrapaV3.0          | <a href="#">cnu_m288a</a> | A03                                                         | 9986707          | 9986860        | <a href="#">t3711.T000132</a> |            |

C)

|                        |                                                                                                                                                                                                                                                                      |                                              |
|------------------------|----------------------------------------------------------------------------------------------------------------------------------------------------------------------------------------------------------------------------------------------------------------------|----------------------------------------------|
| Locus ID               | t3711.T000124                                                                                                                                                                                                                                                        |                                              |
| Locus Name             | qDB1                                                                                                                                                                                                                                                                 |                                              |
| Trait                  | Bolting time <a href="#">G+</a>                                                                                                                                                                                                                                      |                                              |
| Trait Category         | [4]Morphology/Growth                                                                                                                                                                                                                                                 |                                              |
| Analysis Method        | QTL analysis                                                                                                                                                                                                                                                         |                                              |
| Population Name        | CRF3                                                                                                                                                                                                                                                                 |                                              |
| Population Type        | F2:3                                                                                                                                                                                                                                                                 |                                              |
| Position on the Genome | Reference Genome                                                                                                                                                                                                                                                     | BrapaV3.0                                    |
|                        | Nearest Marker 1                                                                                                                                                                                                                                                     | <a href="#">cnu_m616a</a> <a href="#">G+</a> |
| Chromosome             | A02                                                                                                                                                                                                                                                                  |                                              |
| Start Position         | 721260                                                                                                                                                                                                                                                               |                                              |
| End Position           | 721528                                                                                                                                                                                                                                                               |                                              |
| Nearest Marker 2       | <a href="#">At5g12290</a> <a href="#">G+</a>                                                                                                                                                                                                                         |                                              |
| Chromosome             | NA                                                                                                                                                                                                                                                                   |                                              |
| Start Position         | 0                                                                                                                                                                                                                                                                    |                                              |
| End Position           | 0                                                                                                                                                                                                                                                                    |                                              |
| Position(cM)           | Linkage Group                                                                                                                                                                                                                                                        | CRF3 ChrA02                                  |
|                        | LOD Peak Position(cM)                                                                                                                                                                                                                                                | 0                                            |
| Max LOD                | 4.8                                                                                                                                                                                                                                                                  |                                              |
| P Value                |                                                                                                                                                                                                                                                                      |                                              |
| DOI/PMID               | <a href="#">10.1093/dnares/dss029</a>                                                                                                                                                                                                                                |                                              |
| Comment                | Chifu 401-42:long flowering time after vernalization, high plant height, large leaf, many seeds per siliqua, better seed weight; RCB:rapid cycling, short flowering time after vernalization, low plant height, small leaf, low seeds per siliqua, lower seed weight |                                              |

### Supplementary Fig. S7.

A screen view of trait-related loci lists in *Brassica rapa*. A) Graphical view of registered locus positions of the reference genome. B) A part of the list of the registered trait-related loci. The displayed information is changed by selecting the tabs. C) The detailed information of the selected locus. The table is shown by clicking the locus ID in the trait-related loci list. The locus name, trait name, trait category, analysis method, population name, population type, position on the genome estimated via nearest markers, position on the linkage map (if available in the source manuscript), and source manuscript are shown in the table.

A)

Plant GARDEN

TOP > Run BLAST

Search by Sequence  
BLAST

Select BLAST program

- BLASTN (Search for nucleotide sequence against nucleotide sequences)
- BLASTP (Search for protein sequence against protein sequences)
- BLASTX (Search for nucleotide sequence against protein sequences)
- TBLASTN (Search for protein sequence against translated nucleotide sequences)
- TBLASTX (Search for translated nucleotide sequence against translated nucleotide sequences)

Select reference sequences

Plant Species(example:Tomato)

- Acer\_truncatum:version2\_pep
- Actinidia\_chinensis:female\_of\_cv.Hong\_Yang:v3.0\_update\_pep
- Actinidia\_chinensis\_Red5\_PS1\_1.69.0\_pep
- Actinidia\_eriantha\_t165200.G001\_pep
- Aegilops\_tauschii\_Aet\_v4.0\_pep

Select All

Clear

Enter sequence to search  
FASTA Format

Recognize by OCR

Convert

Sequence Input

Enter sequence to search

Number of Search Results to Display  
(optional)

Search results MAX

500

Sequence alignments MAX

250

Other Settings  
(optional)

- Filtering of Query Sequences (DUST for BLASTN, SEG for others)
- Do not perform gap alignment

E-value

0.1

Submit

B)

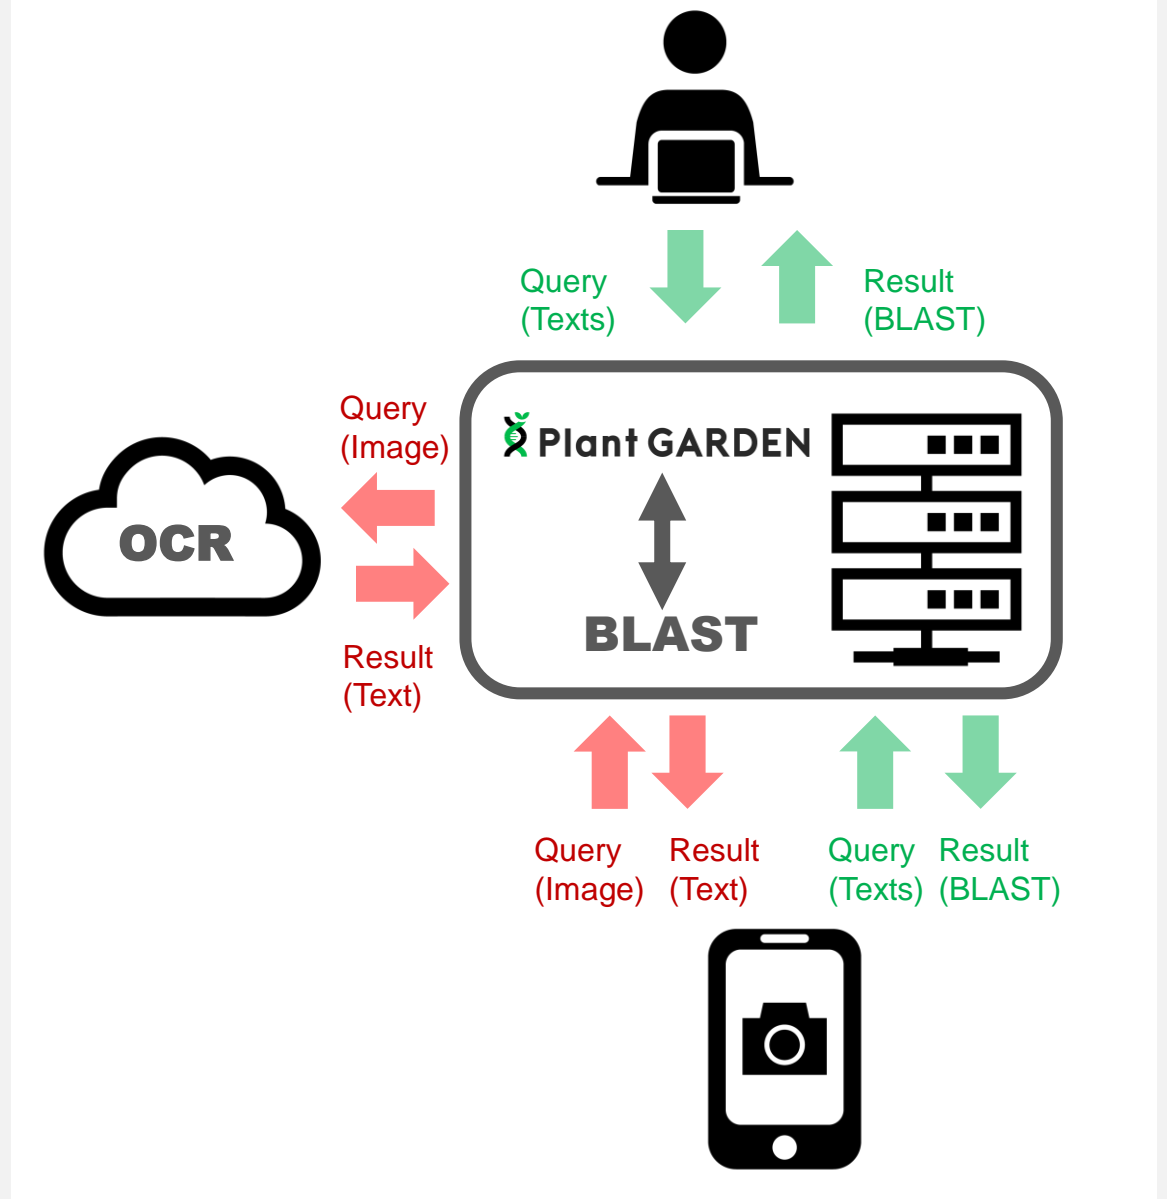

Supplementary Fig. S8.

BLAST analysis in Plant GARDEN. A) A screen view of BLAST analysis in the tablet version. B) The data flow of BLAST analysis in Plant GARDEN with the PC and tablet versions. Red and green represent the flow of OCR and BLAST, respectively.
